# Supplementary material for: Adaptive Evolution as a Predictor of Species-Specific Innate Immune Response
Source: PubMed Central journal article supplement — Mol Biol Evol. 2015 Mar 10;32(7):1717–29. doi: 10.1093/molbev/msv051 (PMC4476151; doi:10.1093/molbev/msv051), 2015-03-10
Supplement: supp_msv051_Supplementry_Table_1.pdf [file supp_msv051_Supplementry_Table_1.pdf]

Supplementary Table 1: Details on genes assessed in this study

| Gene name                                                                 | Status      | Codeml Analysis Results |                                                                                   |                                                                                                                                                                                                                                                                  | Position of positively selected sites <sup>1,2</sup> | P-value of positively selected sites | Population Analysis |                                                                             | Domains      | Interactions | Pathway |
|---------------------------------------------------------------------------|-------------|-------------------------|-----------------------------------------------------------------------------------|------------------------------------------------------------------------------------------------------------------------------------------------------------------------------------------------------------------------------------------------------------------|------------------------------------------------------|--------------------------------------|---------------------|-----------------------------------------------------------------------------|--------------|--------------|---------|
|                                                                           |             | InL                     | Parameter estimates                                                               |                                                                                                                                                                                                                                                                  |                                                      |                                      | SNPs tested         | Unfixed sites                                                               |              |              |         |
| <i>Genes under positive selection specifically in the human lineage</i>   |             |                         |                                                                                   |                                                                                                                                                                                                                                                                  |                                                      |                                      |                     |                                                                             |              |              |         |
| CARD6                                                                     | Passed      | -15625.7673             | p0=0.45953 p1=0.52421 p2=0.00760 p3=0.00867<br>w0=0.17998 w1=1.00000 w2=70.36914  | 264, 346, 382, 750, 767, 805, 818, 903, 916, 937, 998, 1010, and 1031                                                                                                                                                                                            | 13 > 0.50, 0 > 0.95, 0 > 0.99                        | 38                                   | G264E               |                                                                             |              |              |         |
| IRF9                                                                      | Passed      | -5965.31104             | p0=0.66432 p1=0.33167 p2=0.00268 p3=0.00134<br>w0=0.07224 w1=1.00000 w2=431.16939 | 119, 129, and 333                                                                                                                                                                                                                                                | 3 > 0.50, 0 > 0.95, 0 > 0.99                         | 9                                    | None                |                                                                             |              |              |         |
| C1RL                                                                      | Removed (R) | -7968.78747             | p0=0.71660 p1=0.28084 p2=0.00183 p3=0.00072<br>w0=0.10272 w1=1.00000 w2=178.35256 | 103                                                                                                                                                                                                                                                              | 1 > 0.50, 0 > 0.95, 0 > 0.99                         |                                      |                     | CUB Domain                                                                  |              |              |         |
| INPP5D                                                                    | Removed (R) | -32631.6355             | p0=0.89627 p1=0.09099 p2=0.01157 p3=0.00117<br>w0=0.10134 w1=1.00000 w2=999.00000 | 72, 223, 227*, 228**, 235, 239, 241, 244, 249, and 250                                                                                                                                                                                                           | 10 > 0.50, 2 > 0.95, 1 > 0.99                        |                                      |                     | SH2                                                                         |              |              |         |
| LAP2                                                                      | Removed (R) | -31488.1615             | p0=0.77166 p1=0.20323 p2=0.01987 p3=0.00523<br>w0=0.07287 w1=1.00000 w2=999.00000 | 714 and 1194                                                                                                                                                                                                                                                     | 2 > 0.50, 0 > 0.95, 0 > 0.99                         |                                      |                     |                                                                             |              |              |         |
| <i>Genes under positive selection specifically in the mouse lineage</i>   |             |                         |                                                                                   |                                                                                                                                                                                                                                                                  |                                                      |                                      |                     |                                                                             |              |              |         |
| Adipoq                                                                    | Passed      | -3280.8125              | p0=0.73898 p1=0.24047 p2=0.01550 p3=0.00505<br>w0=0.04219 w1=1.00000 w2=998.99930 | 25, 27, 29, and 82                                                                                                                                                                                                                                               | 4 > 0.50, 0 > 0.95, 0 > 0.99                         | 9                                    | None                | Collagen-like                                                               |              |              |         |
| Atg9a                                                                     | Passed      | -21083.0059             | p0=0.95699 p1=0.04084 p2=0.00208 p3=0.00009<br>w0=0.01493 w1=1.00000 w2=26.59349  | 634 and 662*                                                                                                                                                                                                                                                     | 2 > 0.50, 1 > 0.95, 0 > 0.99                         | 3                                    | None                |                                                                             |              |              |         |
| C1inh                                                                     | Passed      | -8556.45091             | p0=0.54686 p1=0.43312 p2=0.01118 p3=0.00885<br>w0=0.10038 w1=1.00000 w2=998.99791 | 332*, 365, 468, 479                                                                                                                                                                                                                                              | 4 > 0.50, 1 > 0.95, 0 > 0.99                         |                                      |                     |                                                                             | C1ra and F12 | Complement   |         |
| C1ra                                                                      | Passed      | -19111.6792             | p0=0.72843 p1=0.25840 p2=0.00972 p3=0.00345<br>w0=0.11188 w1=1.00000 w2=44.28694  | 468, 520, 574, 631, 633, and 634*                                                                                                                                                                                                                                | 6 > 0.50, 1 > 0.95, 0 > 0.99                         | 16                                   | None                | Peptidase S1*                                                               |              | Complement   |         |
| C6                                                                        | Passed      | -25800.2518             | p0=0.61663 p1=0.34800 p2=0.02262 p3=0.01276<br>w0=0.11918 w1=1.00000 w2=177.5151  | 220, 233, 319, 353, 378, 408, 419, 430, 554, 655, 681, 703, 792, and 930                                                                                                                                                                                         | 14 > 0.50, 0 > 0.95, 0 > 0.99                        | 53                                   | R554L               | MACPF, Sushi 1, Kazal-like 1, CCP-1 and 2, Factor I module (FIM) 1 and 2    |              | Complement   |         |
| C8b                                                                       | Passed      | -15259.5645             | p0=0.69526 p1=0.29219 p2=0.00884 p3=0.00371<br>w0=0.13157 w1=1.00000 w2=998.99872 | 242*, 263, 278, 383*, and 488                                                                                                                                                                                                                                    | 5 > 0.50, 2 > 0.95, 0 > 0.99                         | 36                                   | M263I               | MACPF* and EGF-like                                                         |              | Complement   |         |
| Card6                                                                     | Passed      | -15610.418              | p0=0.45723 p1=0.50837 p2=0.01629 p3=0.01811<br>w0=0.18759 w1=1.00000 w2=998.99647 | 394, 501, and 702                                                                                                                                                                                                                                                | 3 > 0.50, 0 > 0.95, 0 > 0.99                         | 4                                    | None                |                                                                             |              | NOD-Like     |         |
| Cd200                                                                     | Passed      | -4840.43777             | p0=0.65241 p1=0.33688 p2=0.00707 p3=0.00365<br>w0=0.11347 w1=1.00000 w2=43.04625  | 129 and 177                                                                                                                                                                                                                                                      | 2 > 0.50, 0 > 0.95, 0 > 0.99                         |                                      |                     | Ig-like V-type (Extracellular) and Ig-like C2-type (Extracellular)          |              | Verify       |         |
| Cd63                                                                      | Passed      | -3469.41048             | p0=0.73747 p1=0.22921 p2=0.02541 p3=0.00790<br>w0=0.05011 w1=1.00000 w2=15.43175  | 31, 118, 143, 184*, 194, and 203                                                                                                                                                                                                                                 | 6 > 0.50, 1 > 0.95, 0 > 0.99                         | 6                                    | None                |                                                                             |              | Lysosome     |         |
| Cfh                                                                       | Passed      | -32274.5643             | p0=0.54145 p1=0.44242 p2=0.00888 p3=0.00725<br>w0=0.15686 w1=1.00000 w2=54.17278  | 209, 243, 474, 767, 1005, 1068, 1074, 1104, 1181, and 1227                                                                                                                                                                                                       | 10 > 0.50, 0 > 0.95, 0 > 0.99                        | 8                                    | None                | Sushi 4, Sushi 13, Sushi 17, Sushi 18, Sushi 19, and Sushi 20               | Itgam        | Complement   |         |
| Ecsit                                                                     | Passed      | -6653.71574             | p0=0.74691 p1=0.21546 p2=0.02920 p3=0.00842<br>w0=0.08329 w1=1.00000 w2=9.67226   | 10, 12, 75, 82, 176, 325, 330**, 348, and 371                                                                                                                                                                                                                    | 9 > 0.50, 1 > 0.95, 1 > 0.99                         | 1                                    | S75L                |                                                                             |              | MAPK         |         |
| Eif2ak2                                                                   | Passed      | -9941.00706             | p0=0.50390 p1=0.42346 p2=0.03947 p3=0.03317<br>w0=0.10192 w1=1.00000 w2=435.75819 | 136, 155, 181, 182*, 344, and 345                                                                                                                                                                                                                                | 6 > 0.50, 1 > 0.95, 0 > 0.99                         |                                      |                     | DRBM 2 and Protein kinase                                                   |              | Multiple     |         |
| F12                                                                       | Passed      | -12985.2912             | p0=0.69339 p1=0.29338 p2=0.00930 p3=0.00393<br>w0=0.09174 w1=1.00000 w2=20.28259  | 45, 65, 166, 243**, and 454                                                                                                                                                                                                                                      | 5 > 0.50, 1 > 0.95, 1 > 0.99                         |                                      |                     | Fibronectin type-II, Fibronectin type-I, Kringle**, Peptidase S1            | Serping1     | Coagulation  |         |
| Grn                                                                       | Passed      | -13333.138              | p0=0.63129 p1=0.36345 p2=0.00334 p3=0.00192<br>w0=0.08402 w1=1.00000 w2=139.90410 | 18, 101, 198, 303, 375*, 382, 411, 549, and 597                                                                                                                                                                                                                  | 9 > 0.50, 1 > 0.95, 0 > 0.99                         | 16                                   | None                | Granulin-1, Granulin-4, Granulin-5*, and Granulin-7                         |              |              |         |
| Ifit2                                                                     | Passed      | -6549.6695              | p0=0.62755 p1=0.35886 p2=0.00865 p3=0.00495<br>w0=0.18240 w1=1.00000 w2=50.21497  | 191, 402, and 420                                                                                                                                                                                                                                                | 3 > 0.50, 0 > 0.95, 0 > 0.99                         | 14                                   | None                | TPR 3 and TPR 7                                                             |              |              |         |
| Il1rapl2                                                                  | Passed      | -9224.48778             | p0=0.93075 p1=0.06482 p2=0.00414 p3=0.00029<br>w0=0.04513 w1=1.00000 w2=313.77759 | 566, 628, and 666*                                                                                                                                                                                                                                               | 3 > 0.50, 1 > 0.95, 0 > 0.99                         | 11                                   | None                |                                                                             |              |              |         |
| Il2rb                                                                     | Passed      | -9843.12548             | p0=0.56334 p1=0.38690 p2=0.02950 p3=0.02026<br>w0=0.11142 w1=1.00000 w2=14.54255  | 4, 13, 31, 55, 174, 202, 347*, 402, 418, 491, 496, and 516                                                                                                                                                                                                       | 12 > 0.50, 1 > 0.95, 0 > 0.99                        |                                      |                     | Extracellular, Fibronectin type-III and Cytoplasmic*                        |              | JAK-STAT     |         |
| Il4ra                                                                     | Passed      | -16760.2901             | p0=0.57272 p1=0.40532 p2=0.01286 p3=0.00910<br>w0=0.16413 w1=1.00000 w2=22.51561  | 47, 67, 308, 330, and 626                                                                                                                                                                                                                                        | 5 > 0.50, 0 > 0.95, 0 > 0.99                         | 51                                   | F47S & D626G        | Extracellular domains, Cytoplasmic domains, and IL4-induced gene expression |              | JAK-STAT     |         |
| Irf5                                                                      | Passed      | -7751.58473             | p0=0.80862 p1=0.18466 p2=0.00547 p3=0.00125<br>w0=0.04140 w1=1.00000 w2=37.63417  | 232, 259, and 262                                                                                                                                                                                                                                                | 3 > 0.50, 0 > 0.95, 0 > 0.99                         | 14                                   | None                |                                                                             |              | TLR          |         |
| Lbp                                                                       | Passed      | -7753.18236             | p0=0.71414 p1=0.27262 p2=0.00958 p3=0.00366<br>w0=0.15781 w1=1.00000 w2=29.65659  | 24, 40 and 329                                                                                                                                                                                                                                                   | 3 > 0.50, 0 > 0.95, 0 > 0.99                         | 33                                   | None                |                                                                             |              | TLR          |         |
| Lgals3                                                                    | Passed      | -2804.56787             | p0=0.78887 p1=0.19010 p2=0.01694 p3=0.00408<br>w0=0.09775 w1=1.00000 w2=61.54204  | 22, 92, 94, and 260                                                                                                                                                                                                                                              | 4 > 0.50, 0 > 0.95, 0 > 0.99                         | 15                                   | None                | γ A γ A unimem repeats of T-γ X(3)-P-[GS]-A and Nuclear export signal       |              |              |         |
| Lrrflp1                                                                   | Passed      | -7901.56219             | p0=0.56794 p1=0.39040 p2=0.02469 p3=0.01697<br>w0=0.10013 w1=1.00000 w2=232.32695 | 328, 449, 468, 480, and 571                                                                                                                                                                                                                                      | 5 > 0.50, 0 > 0.95, 0 > 0.99                         | 49                                   | None                | DNA-binding                                                                 |              |              |         |
| Ltb4r1                                                                    | Passed      | -5596.99679             | p0=0.69576 p1=0.29371 p2=0.00741 p3=0.00313<br>w0=0.05940 w1=1.00000 w2=286.32093 | 53, 101, and 175                                                                                                                                                                                                                                                 | 3 > 0.50, 0 > 0.95, 0 > 0.99                         | 16                                   | None                |                                                                             | Anxa1        | Verify       |         |
| Nlrp14                                                                    | Passed      | -15100.4036             | p0=0.50688 p1=0.33262 p2=0.09691 p3=0.06359<br>w0=0.15174 w1=1.00000 w2=2.96492   | 77, 79*, 186, 212, 219, 254, 257, 263, 272, 281, 284, 291, 294, 315, 319, 333, 358, 393, 415, 424, 453, 465, 530, 549, 552, 553, 584, 613, 657, 679, 684, 685, 687, 696, 782, 810, 814, 829, 846, 848, 902, 908, 912, 931, 953, 956, 958, 978, 982, 984, and 986 | 51 > 0.50, 0 > 0.95, 0 > 0.99                        | 16                                   | A613S               | NACHT, LRR 1-3, LRR 6-9                                                     |              |              |         |
| Nlrp6                                                                     | Passed      | -12055.1676             | p0=0.70988 p1=0.20945 p2=0.06229 p3=0.01838<br>w0=0.08302 w1=1.00000 w2=4.16107   | 22, 25, 72, 77, 80, 81, 85, 96, 101, 113, 114, 190, 192, 251, 260**, 329, 344, 479, 488, 515, 553, 571, 628, 657, 727, 737, 739, 744, 771, 775*, 776, 793, 807, 865, 877, and 880                                                                                | 36 > 0.50, 2 > 0.95, 1 > 0.99                        | 53                                   | None                | DAPIN, NACHT*, LRR 1, and LRR 2                                             |              |              |         |
| Oas2                                                                      | Passed      | -14212.4618             | p0=0.57045 p1=0.38313 p2=0.02777 p3=0.01865<br>w0=0.11466 w1=1.00000 w2=999.00000 | 55, 56, 139, 171, 199, 211, 221, 298, 481, 549, and 711                                                                                                                                                                                                          | 11 > 0.50, 0 > 0.95, 0 > 0.99                        |                                      |                     | OAS domain 1 and 2                                                          |              | Multiple     |         |
| Plec2                                                                     | Passed      | -5052.485198            | p0=0.92757 p1=0.05944 p2=0.01220 p3=0.00078<br>w0=0.01231 w1=1.00000 w2=999.00000 | 461 and 594*                                                                                                                                                                                                                                                     | 2 > 0.50, 1 > 0.95, 0 > 0.99                         | 51                                   | None                |                                                                             |              |              |         |
| Ptpn2                                                                     | Passed      | -6009.55698             | p0=0.83598 p1=0.14967 p2=0.01217 p3=0.00218<br>w0=0.06919 w1=1.00000 w2=15.81386  | 166, 206, 319, 321, and 329                                                                                                                                                                                                                                      | 5 > 0.50, 0 > 0.95, 0 > 0.99                         |                                      |                     |                                                                             |              | Verify       |         |
| Rnf31                                                                     | Passed      | -22413.99042            | p0=0.76580 p1=0.23227 p2=0.00147 p3=0.00045<br>w0=0.06113 w1=1.00000 w2=999.00000 | 203, 431, and 1025                                                                                                                                                                                                                                               | 3 > 0.50, 0 > 0.95, 0 > 0.99                         | 24                                   | None                |                                                                             |              |              |         |
| Sirt1                                                                     | Passed      | -6335.55297             | p0=0.77272 p1=0.21421 p2=0.01023 p3=0.00284<br>w0=0.03736 w1=1.00000 w2=434.93076 | 107, 537, 698, and 701                                                                                                                                                                                                                                           | 4 > 0.50, 0 > 0.95, 0 > 0.99                         |                                      |                     | NAD-dependent protein deacetylase sirtuin-1 (long chain)                    |              |              |         |
| Snap23                                                                    | Passed      | -1780.13675             | p0=0.82284 p1=0.13205 p2=0.03887 p3=0.00624<br>w0=0.05350 w1=1.00000 w2=365.11678 | 109, 133, and 197                                                                                                                                                                                                                                                | 3 > 0.50, 0 > 0.95, 0 > 0.99                         | 2                                    | None                | t-SNARE coiled-coil homology 2                                              |              | SNARE        |         |
| Stat2                                                                     | Passed      | -12031.1032             | p0=0.58573 p1=0.38315 p2=0.01881 p3=0.01231<br>w0=0.05851 w1=1.00000 w2=302.58291 | 21, 130, 149, 157, 195, 205, 218, 354, 623*, 869, 871, 874, 876, and 877                                                                                                                                                                                         | 14 > 0.50, 1 > 0.95, 0 > 0.99                        | 58                                   | L874M               | SH2*                                                                        | Irf5         | JAK-STAT     |         |
| Tcf4                                                                      | Passed      | -5052.485198            | p0=0.92757 p1=0.05944 p2=0.01220 p3=0.00078<br>w0=0.01231 w1=1.00000 w2=999.00000 | 139                                                                                                                                                                                                                                                              | 1 > 0.50, 0 > 0.95, 0 > 0.99                         | 20                                   | None                |                                                                             |              |              |         |
| Tlr3                                                                      | Passed      | -27528.5971             | p0=0.69091 p1=0.29956 p2=0.00665 p3=0.00288<br>w0=0.09892 w1=1.00000 w2=16.85129  | 266, 297, and 603                                                                                                                                                                                                                                                | 3 > 0.50, 0 > 0.95, 0 > 0.99                         | 4                                    | None                | LRR 8, LRR 9, and LRR 21                                                    | TICAM1       | TLR          |         |
| Trif                                                                      | Passed      | -12203.9234             | p0=0.66104 p1=0.26408 p2=0.05351 p3=0.02138<br>w0=0.12718 w1=1.00000 w2=4.47517   | 18, 327, 338, 388, 482, 556, and 711                                                                                                                                                                                                                             | 8 > 0.50, 0 > 0.95, 0 > 0.99                         | 3                                    | None                |                                                                             | TLR3         | TLR          |         |
| Csf2rb                                                                    | Removed (R) | -26029.902              | p0=0.58565 p1=0.39059 p2=0.01425 p3=0.00951<br>w0=0.20770 w1=1.00000 w2=21.40825  | 169, 271, 288, 473, 536, 569, and 576                                                                                                                                                                                                                            | 7 > 0.50, 0 > 0.95, 0 > 0.99                         | 50                                   | N536D               | Fibronectin type-III I and Cytoplasmic                                      |              | JAK-STAT     |         |
| Cd22                                                                      | Removed (R) | -21287.1128             | p0=0.51922 p1=0.46728 p2=0.00711 p3=0.00640<br>w0=0.13273 w1=1.00000 w2=98.82292  | 137, 190, 271, 474, and 812                                                                                                                                                                                                                                      | 5 > 0.50, 0 > 0.95, 0 > 0.99                         |                                      |                     | Ig-like V-type, Ig-like C2-type 1, 2, and 4                                 |              | Verify       |         |
| Itgam                                                                     | Removed (R) | -24765.6859             | p0=0.69864 p1=0.28556 p2=0.01121 p3=0.00458<br>w0=0.14594 w1=1.00000 w2=998.99893 | 23, 45, 820, 831, 844, 1035, 1089, 1092, and 1131                                                                                                                                                                                                                | 9 > 0.50, 1 > 0.95, 0 > 0.99                         |                                      |                     | FG-GAP 1 motif                                                              | Cfh          | Complement   |         |
| Ptk2                                                                      | Removed (R) | -26657.7467             | p0=0.96669 p1=0.03070 p2=0.00253 p3=0.00008<br>w0=0.03166 w1=1.00000 w2=999.00000 | 390* and 800                                                                                                                                                                                                                                                     | 2 > 0.50, 1 > 0.95, 0 > 0.99                         |                                      |                     | Region for interaction with TGFβ111                                         |              | Multiple     |         |
| Sirpa                                                                     | Removed (R) | -10063.2315             | p0=0.55941 p1=0.37830 p2=0.03716 p3=0.02513<br>w0=0.09496 w1=1.00000 w2=19.05016  | 51, 52*, 69, 77, 83, 91, 193, 202, 221, 224, 226, 237, 238, 250, 276, 297, 305, 307, 338*, 344, and 490                                                                                                                                                          | 21 > 0.50, 2 > 0.95, 0 > 0.99                        |                                      |                     | Ig-like V-type* and Ig-like C1-type 1 and 2*                                |              | Verify       |         |
| Tlr8                                                                      | Removed (R) | -26914.2776             | p0=0.64539 p1=0.34225 p2=0.00807 p3=0.00428<br>w0=0.07990 w1=1.00000 w2=11.83741  | 44, 751, 764*, 778, 802*, 864, and 1003                                                                                                                                                                                                                          | 7 > 0.50, 2 > 0.95, 0 > 0.99                         |                                      |                     | LRR 1, LRR 23, LRR 26*, and TIR                                             |              | TLR          |         |
| Traf5                                                                     | Removed (R) | -11832.62               | p0=0.79115 p1=0.15526 p2=0.04480 p3=0.00879<br>w0=0.09787 w1=1.00000 w2=681.22327 | 133, 308, 309, and 339                                                                                                                                                                                                                                           | 4 > 0.50, 0 > 0.95, 0 > 0.99                         | 3                                    | None                | TRAF-type 1                                                                 |              | Multiple     |         |
| Tyro3                                                                     | Removed (R) | -24726.15312            | p0=0.77200 p1=0.20790 p2=0.01584 p3=0.00427<br>w0=0.08897 w1=1.00000 w2=998.99820 | 85, 101, 825, and 826                                                                                                                                                                                                                                            | 4 > 0.50, 0 > 0.95, 0 > 0.99                         |                                      |                     |                                                                             |              |              |         |
| Zp3r                                                                      | Removed (R) | -19249.87608            | p0=0.38277 p1=0.51708 p2=0.04260 p3=0.05755<br>w0=0.15358 w1=1.00000 w2=8.54244   | 3, 7, 39, 110, 174, 179, 206, 212, 219, 244, 311, 454, 460, 461, 470, 485, 488, 510, 514, 518*, 524, 528, 537, 541, and 546                                                                                                                                      | 25 > 0.50, 1 > 0.95, 0 > 0.99                        |                                      |                     | Sushi 2, 3, 5, and 7                                                        |              |              |         |
| <i>Genes under positive selection specifically in the primate lineage</i> |             |                         |                                                                                   |                                                                                                                                                                                                                                                                  |                                                      |                                      |                     |                                                                             |              |              |         |
| ACHE                                                                      | Passed      | -12717.91667            | p0=0.85629 p1=0.12361 p2=0.01756 p3=0.00254<br>w0=0.03849 w1=1.00000 w2=105.25786 | 23**, 171, 429, 488, 494, 604**, and 605**                                                                                                                                                                                                                       | 7 > 0.50, 3 > 0.95, 3 > 0.99                         |                                      |                     |                                                                             |              |              |         |
| APOA1                                                                     | Passed      | -2855.996221            | p0=0.81375 p1=0.15102 p2=0.02971 p3=0.00551<br>w0=0.10502 w1=1.00000 w2=27.92713  | 119*, 151, 260*                                                                                                                                                                                                                                                  | 3 > 0.50, 2 > 0.95, 0 > 0.99                         |                                      |                     |                                                                             |              |              |         |

| Gene name                                                                 | Status      | Codeml Analysis Results |                                                                                   |                                                                                                                            |                                      | Population Analysis |               | Domains | Interactions | Pathway                                                     |
|---------------------------------------------------------------------------|-------------|-------------------------|-----------------------------------------------------------------------------------|----------------------------------------------------------------------------------------------------------------------------|--------------------------------------|---------------------|---------------|---------|--------------|-------------------------------------------------------------|
|                                                                           |             | InL                     | Parameter estimates                                                               | Position of positively selected sites <sup>1,2</sup>                                                                       | P-value of positively selected sites | SNPs tested         | Unfixed sites |         |              |                                                             |
| <i>Genes under positive selection specifically in the rodent lineage</i>  |             |                         |                                                                                   |                                                                                                                            |                                      |                     |               |         |              |                                                             |
| Bear1                                                                     | Passed      | -16655.27502            | p0=0.83443 p1=0.14246 p2=0.01973 p3=0.00337<br>w0=0.03543 w1=1.00000 w2=999.00000 | 666, 691, 722, 740, 870, 944                                                                                               | 6 > 0.50, 0 > 0.95, 0 > 0.99         |                     |               |         |              |                                                             |
| Inpp5d                                                                    | Passed      | -32669.65616            | p0=0.90623 p1=0.09080 p2=0.00270 p3=0.00027<br>w0=0.10264 w1=1.00000 w2=997.43640 | 760, 1022                                                                                                                  | 2 > 0.50, 0 > 0.95, 0 > 0.99         |                     |               |         |              |                                                             |
| Mst1r                                                                     | Passed      | -46793.76024            | p0=0.63668 p1=0.35667 p2=0.00426 p3=0.00239<br>w0=0.12113 w1=1.00000 w2=144.45238 | 791, 1051*                                                                                                                 | 2 > 0.50, 1 > 0.95, 0 > 0.99         |                     |               |         |              | IPT/TIG 2                                                   |
| Nef1                                                                      | Passed      | -6738.969644            | p0=0.86960 p1=0.12200 p2=0.00737 p3=0.00103<br>w0=0.06396 w1=1.00000 w2=998.99896 | 43**, 304, 323, 414                                                                                                        | 4 > 0.50, 1 > 0.95, 1 > 0.99         |                     |               |         |              | PX                                                          |
| Nos2                                                                      | Passed      | -34686.44064            | p0=0.78681 p1=0.19467 p2=0.01485 p3=0.00367<br>w0=0.10331 w1=1.00000 w2=15.76793  | 133, 251, 372*, 678, 692, 924, 978                                                                                         | 7 > 0.50, 1 > 0.95, 0 > 0.99         |                     |               |         |              | Flavodoxin-like and FAD-binding FR-type                     |
| Rel                                                                       | Passed      | -14041.33044            | p0=0.57332 p1=0.41987 p2=0.00393 p3=0.00288<br>w0=0.06109 w1=1.00000 w2=999.00000 | 474                                                                                                                        | 1 > 0.50, 0 > 0.95, 0 > 0.99         |                     |               |         |              |                                                             |
| Rnf31                                                                     | Passed      | -22413.29401            | p0=0.76809 p1=0.22861 p2=0.00254 p3=0.00076<br>w0=0.06200 w1=1.00000 w2=999.00000 | 104, 135, 276, 824, 872                                                                                                    | 5 > 0.50, 0 > 0.95, 0 > 0.99         |                     |               |         |              | Removed (R)                                                 |
| Vdr                                                                       | Passed      | -9510.441834            | p0=0.77452 p1=0.21870 p2=0.00528 p3=0.00149<br>w0=0.04005 w1=1.00000 w2=998.99997 | 183*, 325                                                                                                                  | 2 > 0.50, 1 > 0.95, 0 > 0.99         |                     |               |         |              |                                                             |
| Tyro3                                                                     | Removed (R) | -24732.93757            | p0=0.78088 p1=0.21180 p2=0.00575 p3=0.00156<br>w0=0.08847 w1=1.00000 w2=709.23987 | 155*                                                                                                                       | 1 > 0.50, 1 > 0.95, 0 > 0.99         |                     |               |         |              | Ig-like C2-type 1                                           |
| <i>Genes under positive selection specifically in the murinae lineage</i> |             |                         |                                                                                   |                                                                                                                            |                                      |                     |               |         |              |                                                             |
| Bear1                                                                     | Passed      | -16655.2351             | p0=0.83519 p1=0.14510 p2=0.01679 p3=0.00292<br>w0=0.03568 w1=1.00000 w2=999.00000 | 208, 666                                                                                                                   | 2 > 0.50, 0 > 0.95, 0 > 0.99         |                     |               |         |              |                                                             |
| C11nh                                                                     | Passed      | -8300.143711            | p0=0.55879 p1=0.43149 p2=0.00548 p3=0.00423<br>w0=0.10625 w1=1.00000 w2=114.24086 | 268, 378                                                                                                                   | 2 > 0.50, 0 > 0.95, 0 > 0.99         |                     |               |         |              |                                                             |
| C9                                                                        | Passed      | -12947.08599            | p0=0.58215 p1=0.40568 p2=0.00717 p3=0.00500<br>w0=0.10479 w1=1.00000 w2=43.19163  | 483, 486*                                                                                                                  | 2 > 0.50, 1 > 0.95, 0 > 0.99         |                     |               |         |              | MACPF                                                       |
| Ccdc88a                                                                   | Passed      | -40782.06554            | p0=0.91943 p1=0.07955 p2=0.00094 p3=0.00008<br>w0=0.04403 w1=1.00000 w2=281.60012 | 197, 223, 487, 712, 724, 746, 749, 786, 1126, 1153, 1169, 1175, 1406, 1417, 1422, 1947, 1976, 2085, 2087, 2090, 2255, 2280 | 22 > 0.50, 0 > 0.95, 0 > 0.99        |                     |               |         |              |                                                             |
| Ctsd                                                                      | Passed      | -11909.81464            | p0=0.77032 p1=0.16135 p2=0.05649 p3=0.01183<br>w0=0.09928 w1=1.00000 w2=408.50878 | 12, 50, 286, 378, 381                                                                                                      | 5 > 0.50, 0 > 0.95, 0 > 0.99         |                     |               |         |              |                                                             |
| Dhx9                                                                      | Passed      | -21536.77297            | p0=0.87452 p1=0.11497 p2=0.00929 p3=0.00122<br>w0=0.03548 w1=1.00000 w2=9.54713   | 91, 289*, 381, 685*                                                                                                        | 4 > 0.50, 2 > 0.95, 0 > 0.99         |                     |               |         |              | MTAD                                                        |
| Ltb4r                                                                     | Passed      | -5599.364798            | p0=0.69273 p1=0.28326 p2=0.01704 p3=0.00697<br>w0=0.06121 w1=1.00000 w2=742.27852 | 19, 258                                                                                                                    | 2 > 0.50, 0 > 0.95, 0 > 0.99         |                     |               |         |              |                                                             |
| Nup153                                                                    | Passed      | -39350.55592            | p0=0.70761 p1=0.28476 p2=0.00544 p3=0.00219<br>w0=0.13305 w1=1.00000 w2=13.02906  | 723, 769, 940, 1136, 1463                                                                                                  | 5 > 0.50, 0 > 0.95, 0 > 0.99         |                     |               |         |              |                                                             |
| Olfm4                                                                     | Passed      | -4759.933388            | p0=0.58661 p1=0.34625 p2=0.04222 p3=0.02492<br>w0=0.04244 w1=1.00000 w2=34.87299  | 17, 58, 186, 211, 233, 234, 237, 289, 319, 354, 455                                                                        | 11 > 0.50, 0 > 0.95, 0 > 0.99        |                     |               |         |              | Olfactomedin-like                                           |
| Otub2                                                                     | Passed      | -3903.653786            | p0=0.86336 p1=0.07916 p2=0.05266 p3=0.00483<br>w0=0.03434 w1=1.00000 w2=373.90617 | 267                                                                                                                        | 1 > 0.50, 0 > 0.95, 0 > 0.99         |                     |               |         |              | OTU                                                         |
| Plec2                                                                     | Passed      | -33334.996              | p0=0.95797 p1=0.03820 p2=0.00369 p3=0.00015<br>w0=0.04905 w1=1.00000 w2=998.65099 | 222, 407*, 544, 636, 1150, 1401*                                                                                           | 6 > 0.50, 2 > 0.95, 0 > 0.99         |                     |               |         |              | PI-PLC X-box, SH2 1, PI-PLC Y-box                           |
| Pml                                                                       | Passed      | -17023.9819             | p0=0.75786 p1=0.21644 p2=0.01999 p3=0.00571<br>w0=0.12529 w1=1.00000 w2=20.00909  | 120, 276, 394, 576, 722, 750, 838, 971, 1008                                                                               | 9 > 0.50, 0 > 0.95, 0 > 0.99         |                     |               |         |              |                                                             |
| Ptk2b                                                                     | Passed      | -25172.43122            | p0=0.95569 p1=0.03864 p2=0.00545 p3=0.00022<br>w0=0.03450 w1=1.00000 w2=6.89029   | 345*, 1222*, 1225                                                                                                          | 3 > 0.50, 2 > 0.95, 0 > 0.99         |                     |               |         |              | FERM and Focal adhesion targeting (FAT)                     |
| Rasgef1b                                                                  | Passed      | -10514.23732            | p0=0.96525 p1=0.03208 p2=0.00258 p3=0.00009<br>w0=0.03518 w1=1.00000 w2=43.56554  | 126*                                                                                                                       | 1 > 0.50, 1 > 0.95, 0 > 0.99         |                     |               |         |              | N-terminal Ras-GEF                                          |
| Rsad2                                                                     | Passed      | -7521.535098            | p0=0.75983 p1=0.23385 p2=0.00483 p3=0.00149<br>w0=0.03778 w1=1.00000 w2=10.15840  | 40                                                                                                                         | 1 > 0.50, 0 > 0.95, 0 > 0.99         |                     |               |         |              |                                                             |
| Rumx3                                                                     | Passed      | -6980.76136             | p0=0.86575 p1=0.12481 p2=0.00825 p3=0.00119<br>w0=0.03573 w1=1.00000 w2=130.19437 | 371, 436*, 471                                                                                                             | 3 > 0.50, 1 > 0.95, 0 > 0.99         |                     |               |         |              |                                                             |
| Traf6                                                                     | Passed      | -15379.32643            | p0=0.82256 p1=0.16704 p2=0.00865 p3=0.00176<br>w0=0.07399 w1=1.00000 w2=102.21019 | 16*                                                                                                                        | 1 > 0.50, 1 > 0.95, 0 > 0.99         |                     |               |         |              |                                                             |
| Tyk2                                                                      | Passed      | -34832.07016            | p0=0.80527 p1=0.18559 p2=0.00742 p3=0.00171<br>w0=0.10243 w1=1.00000 w2=249.63150 | 124, 158, 618, 628, 749, 1202                                                                                              | 6 > 0.50, 0 > 0.95, 0 > 0.99         |                     |               |         |              | FERM and Protein kinase 1                                   |
| Igf1r                                                                     | Removed (R) | -32712.18489            | p0=0.92792 p1=0.07105 p2=0.00096 p3=0.00007<br>w0=0.04690 w1=1.00000 w2=315.18544 | 161, 264**                                                                                                                 | 2 > 0.50, 1 > 0.95, 1 > 0.99         |                     |               |         |              | Insulin-like growth factor 1 receptor alpha chain           |
| Ilgam                                                                     | Removed (R) | -24779.57551            | p0=0.70311 p1=0.28691 p2=0.00709 p3=0.00289<br>w0=0.14745 w1=1.00000 w2=998.99906 | 99, 133, 215, 227, 473, 799                                                                                                | 6 > 0.50, 0 > 0.95, 0 > 0.99         |                     |               |         |              | FG-GAP 2 and VWFA                                           |
| Mst1r                                                                     | Removed (R) | -46802.09026            | p0=0.63555 p1=0.35503 p2=0.00604 p3=0.00337<br>w0=0.12131 w1=1.00000 w2=33.79659  | 110, 289, 312, 585, 824, 1184                                                                                              | 6 > 0.50, 0 > 0.95, 0 > 0.99         |                     |               |         |              | Macrophage-stimulating protein receptor alpha & beta chains |
| Nup214                                                                    | Removed (R) | -44322.0221             | p0=0.72051 p1=0.27112 p2=0.00608 p3=0.00229<br>w0=0.12311 w1=1.00000 w2=37.36046  | 118, 449, 466, 1334, 1565                                                                                                  | 5 > 0.50, 0 > 0.95, 0 > 0.99         |                     |               |         |              |                                                             |
| Tyro3                                                                     | Removed (R) | -24734.57377            | p0=0.77965 p1=0.21212 p2=0.00647 p3=0.00176<br>w0=0.08839 w1=1.00000 w2=46.83218  | 165, 169, 191, 267, 287, 305, 474*, 513                                                                                    | 8 > 0.50, 1 > 0.95, 0 > 0.99         |                     |               |         |              | Ig-like C2-type 1, 2, Fibronectin type-III 1, and 2         |

<sup>1</sup>Positions given in ancestral lineages are human for primates and mouse for rodent and murinae.

<sup>2</sup>The posterior probability of each positively selected site is indicated as follows: \* >0.95, \*\* >0.99 and no asterisk indicates >0.50
